# Supplementary material for: The Welsh study of mothers and babies: protocol for a population-based cohort study to investigate the clinical significance of defined ultrasound findings of uncertain significance
Source: PubMed Central journal article supplement (PMC4029820; doi:10.1186/1471-2393-14-164), 2014-05-08
Supplement: 1471-2393-14-164-S1.pdf [file 1471-2393-14-164-S1.pdf]

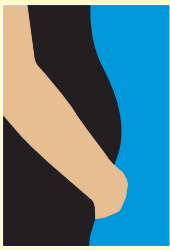

# Welsh Study of Mothers and Babies

## Yr Astudiaeth o Famau a Babanod yng Nghymru

Funded by the Welsh Assembly Government/Medical Research Council Health Research Award Partnership  
Ariannwyd trwy Bartneriaeth Dyfarniadau Ymchwil Iechyd Llywodraeth Cynulliad Cymru/Cyngor Ymchwil Feddygol

NHS Number or Addressograph  
Rhif GIG neu Addressograph

### Ffurflen ganiatâd

Rhowch gylch o gwmpas **Ydw** neu **Na**

|                                                                                                                                                                                                                                                       |     |    |
|-------------------------------------------------------------------------------------------------------------------------------------------------------------------------------------------------------------------------------------------------------|-----|----|
| Rydw i'n cadarnhau fy mod i wedi darllen a deall y daflen wybodaeth 'Yr Astudiaeth o Famau a Babanod yng Nghymru' (rhifyn 1: Ebrill 2008).                                                                                                            | Ydw | Na |
| Rydw i wedi cael cyfle i feddwl am y wybodaeth ac i ofyn cwestiynau, ac rydw i'n fodlon gyda'r atebion a gefais i fy nghwestiynau.                                                                                                                    | Ydw | Na |
| <b>Rydw i'n cytuno i gymryd rhan yn yr Astudiaeth o Famau a Babanod yng Nghymru.</b>                                                                                                                                                                  | Ydw | Na |
| Rydw i'n deall nad oes rhaid i mi gymryd rhan. Rydw i'n rhydd i dynnu'n ôl o'r astudiaeth unrhyw bryd, heb orfod rhoi unrhyw reswm, ac ni fydd hyn yn effeithio ar fy ngofal cyn-geni na fy hawliau cyfreithiol.                                      | Ydw | Na |
| Rydw i'n deall y bydd tîm ymchwil yr astudiaeth yn gweld y wybodaeth a gesglir yn arferol amdanaf i a fy mabi, os yw'n berthnasol i'r ymchwil hwn. Rydw i'n rhoi fy nghaniatâd i'r tîm ymchwil ddefnyddio'r wybodaeth hon gan ddefnyddio fy rhif GIG. | Ydw | Na |
| Rydw i'n deall y bydd canlyniadau fy mhrawf sgrinio am syndrom Down, os byddaf i'n cael y prawf hwn, ar gael i'r tîm ymchwil.                                                                                                                         | Ydw | Na |
| Rydw i'n deall y bydd canlyniadau gweithred amniocentesis, os byddaf i'n cael cynnig un ac yn ei derbyn, ar gael i'r tîm ymchwil.                                                                                                                     | Ydw | Na |
| Rydw i'n deall y bydd canlyniadau'r prawf smotyn gwaed y newydd-anedig a fydd yn cael ei wneud ar fy mabi, ar gael i'r tîm ymchwil.                                                                                                                   | Ydw | Na |
| Rydw i'n fodlon i'r tîm ymchwil ysgrifennu ataf i ar ôl i fy mabi gael ei eni.                                                                                                                                                                        | Ydw | Na |

### Consent form

Please circle **Yes** or **No**

|                                                                                                                                                                                                                                                           |     |    |
|-----------------------------------------------------------------------------------------------------------------------------------------------------------------------------------------------------------------------------------------------------------|-----|----|
| I confirm that I have read and understood the information for women 'Welsh Study of Mothers and Babies' (edition 1: April 2008).                                                                                                                          | Yes | No |
| I have had the chance to think about the information and ask questions, and have had those questions answered satisfactorily.                                                                                                                             | Yes | No |
| <b>I agree to take part in the Welsh Study of Mothers and Babies.</b>                                                                                                                                                                                     | Yes | No |
| I understand that I don't have to take part, I am free to withdraw from the study at any time without giving any reason, and that this won't affect my antenatal care or legal rights.                                                                    | Yes | No |
| I understand that the information that is routinely collected about me and my baby will be looked at by the study research team, if it is relevant to this research. I give permission for the research team to use this information using my NHS number. | Yes | No |
| If I accept an antenatal screening test for Down's syndrome, I understand that the results will be available to the research team.                                                                                                                        | Yes | No |
| If I am offered and accept an amniocentesis procedure, I understand that the results will be available to the research team.                                                                                                                              | Yes | No |
| I understand the results of the newborn blood-spot screening that will be carried out on my baby will be available to the research team.                                                                                                                  | Yes | No |
| I agree for the study team to write to me after my baby has been born.                                                                                                                                                                                    | Yes | No |

Your Name/Eich Enw

Your Date of Birth/Eich dyddiad geni \_\_\_ / \_\_\_ / \_\_\_\_

Your Signature/Eich Llofnod

Date/Dyddiad \_\_\_ / \_\_\_ / \_\_\_\_

Name of person getting consent

Enw'r person sy'n gofyn am ganiatâd

Signature/Llofnod

Date/Dyddiad \_\_\_ / \_\_\_ / \_\_\_\_

When completed, please give the participant a copy, one copy for the researcher site file, one copy for the sonographer and one copy to be filed in the maternity notes.

Ar ôl i'r ffurflen gael ei llenwi, gwnewch dri copi ohoni. Rhowch un copi i'r fam, un copi i'r sonograffydd, cadwch un copi mewn ffeil ar safle'r ymchwilydd a ffeiliwch y ffurflen wreiddiol yn y nodiadau mamolaeth.
